# Supplementary material for: Multiregion Sequencing Reveals the Genetic Heterogeneity and Evolutionary History of Osteosarcoma and Matched Pulmonary Metastases
Source: Oxford University Press journal article supplement (doi:10.1158/0008-5472.can-18-1086), 2018-11-02
Supplement: 199971_3_supp_5067579_pg4r3x.xls [file 199971_3_supp_5067579_pg4r3x.xls]

## Sheet: Sheet1
Patient	OS Diagnosis Age in Years	Gender	Tumor Type	Organ Site	Tumor region	WES Average Depth on target Region(X)	WES Coverage of Target Region	WES Fraction of Target Covered >50x	Validated WES Average Sequencing Depth on Target(X)	Validated WES Coverage of Target Region	Validated WES Fraction of Target Covered > 50x
OS01	22	Male	MT	Pulmo Dexter	MT	180.42	0.999	0.995	NA	NA	NA
			PT	Left Thighbone	PT_1	360	0.9991	0.9855	NA	NA	NA
					PT_2	227	0.999	0.96	NA	NA	NA
					PT_3	248	0.999	0.9657	NA	NA	NA
					PT_4	186	0.9991	0.9473	NA	NA	NA
					PT_5	223.24	0.999	0.996	NA	NA	NA
OS02	12	Male	MT	Pulmo Dexter	MT_1	237	0.9991	0.9663	NA	NA	NA
					MT_2	192	0.999	0.9425	NA	NA	NA
					MT_3	246	0.9991	0.9609	NA	NA	NA
					MT_4	202	0.999	0.946	NA	NA	NA
					MT_5	166.46	0.999	0.995	NA	NA	NA
			PT	Right Thighbone	PT_1	258	0.999	0.9651	NA	NA	NA
					PT_2	243	0.9991	0.9737	NA	NA	NA
					PT_3	484	0.9992	0.994	NA	NA	NA
					PT_4	254	0.9991	0.9732	NA	NA	NA
					PT_5	316.31	0.999	0.998	NA	NA	NA
OS03	9	Female	MT	Pulmo Sinisterta	MT_1	279	0.9979	0.9694	NA	NA	NA
					MT_2	230	0.9976	0.9381	NA	NA	NA
					MT_3	226	0.998	0.9553	NA	NA	NA
					MT_4	288	0.9979	0.9667	NA	NA	NA
					MT_5	188	0.998	0.9508	NA	NA	NA
					MT_6	198	0.998	0.9551	NA	NA	NA
			PT	Right Thighbone	PT_1	179	0.9977	0.9237	NA	NA	NA
					PT_2	192	0.9978	0.9422	NA	NA	NA
					PT_3	217	0.9978	0.9462	NA	NA	NA
					PT_4	229	0.9979	0.9567	NA	NA	NA
OS04	9	Male	MT	Pulmo Sinisterta	MT	229	0.999	0.9464	NA	NA	NA
					MT_1	244	0.9988	0.937	NA	NA	NA
					MT_2	227	0.9988	0.933	NA	NA	NA
					MT_3	208	0.9986	0.9151	NA	NA	NA
					MT_4	271	0.999	0.9552	NA	NA	NA
			PT	Left Shankbone	PT	264	0.999	0.9608	NA	NA	NA
					PT_1	257	0.9989	0.9556	NA	NA	NA
					PT_2	257	0.9989	0.9509	NA	NA	NA
					PT_3	305	0.9989	0.9625	NA	NA	NA
					PT_4	256	0.999	0.958	NA	NA	NA
OS05	9	Female	MT	Pulmo Sinisterta	MT	206	0.9979	0.9431	NA	NA	NA
			PT	Left Fibula	PT_1	318	0.9982	0.9804	NA	NA	NA
					PT_2	220	0.9981	0.9622	NA	NA	NA
					PT_3	270	0.9981	0.9769	NA	NA	NA
					PT_4	263	0.9981	0.9664	NA	NA	NA
					PT_5	230	0.998	0.964	NA	NA	NA
OS06	15	Female	M1T	Inferior Lobe of Pulmo Sinisterta	MT1_1	234	0.9979	0.9546	904	0.9984	0.9941
					MT1_2	187.06	0.998	0.995	680	0.999	0.9931
			M2T	Middle Lobe of Pulmo Sinisterta	MT2_1	195	0.9981	0.9419	658	0.9985	0.9936
					MT2_2	220	0.998	0.9566	766	0.9985	0.9947
					MT2_3	198	0.998	0.9394	637	0.9985	0.9936
					MT2_4	185.73	0.998	0.995	713	0.999	0.9936
			M3T	Left Kidney	MT3_1	270	0.9979	0.9632	674	0.9982	0.9924
					MT3_2	236	0.9979	0.9518	836	0.9984	0.9937
					MT3_3	300	0.9982	0.971	768	0.9984	0.9938
					MT3_4	314	0.9981	0.9704	994	0.9985	0.9946
					MT3_5	249	0.998	0.9623	841	0.9984	0.9945
					MT3_6	194.98	0.998	0.994	688	0.9986	0.9922
			PT	Left Proximal Humerus	PT_1	216	0.998	0.962	648	0.9985	0.9943
					PT_2	214	0.9981	0.9612	750	0.9986	0.9957
					PT_3	257	0.9981	0.9695	800	0.9985	0.9949
					PT_4	293.96	0.999	0.996	905	0.9989	0.9949
OS08	8	Male	MT	Pulmo Sinisterta	MT_1	257	0.9991	0.9689	NA	NA	NA
					MT_2	235	0.9991	0.9619	NA	NA	NA
					MT_3	206	0.9991	0.9563	NA	NA	NA
					MT_4	254	0.9991	0.9728	NA	NA	NA
			PT	Right Humerus	PT_1	215	0.9989	0.9415	NA	NA	NA
					PT_2	199	0.9992	0.9545	NA	NA	NA
					PT_3	244	0.9991	0.9601	NA	NA	NA
					PT_4	204	0.9991	0.9559	NA	NA	NA
					PT_5	287	0.9989	0.9619	NA	NA	NA
OS09	19	Male	MT	Pulmo Dexter	MT_1	191	0.999	0.9295	603	0.9992	0.9936
					MT_2	326.64	0.999	0.997	995	0.9993	0.9959
			PT	Left Femur	PT_1	225	0.999	0.9589	744	0.9993	0.9949
					PT_2	343	0.9992	0.9852	1034	0.9993	0.9973
					PT_3	293	0.999	0.9696	739	0.9992	0.9934
					PT_4	223	0.9991	0.964	763	0.9993	0.996
					PT_5	230	0.9991	0.9688	792	0.9993	0.9965
					PT_6	229	0.9991	0.968	796	0.9993	0.9965
					PT_7	166.62	0.999	0.995	582	0.9993	0.9935
OS10	19	Male	MT	Pulmo Dexter	MT_1	242	0.9991	0.9627	722	0.9993	0.9951
					MT_2	230	0.9991	0.9574	759	0.9993	0.9955
					MT_3	171.37	0.999	0.995	616	0.9993	0.993
			PT	Left Shinbone	PT_1	330	0.9992	0.985	806	0.9993	0.9966
					PT_2	180	0.9991	0.9443	443	0.9993	0.993
					PT_3	186	0.9991	0.9477	556	0.9993	0.9945
					PT_4	196	0.9991	0.9446	556	0.9993	0.9936
					PT_5	161.25	0.999	0.995	526	0.9993	0.9921
OS07	14	Female	MT	Pulmo Dexter	MT	201	0.9982	0.9464	NA	NA	NA
			PT	Left Thighbone	PT	198	0.9983	0.8876	NA	NA	NA
